# Supplementary material
Source: HighWire-hosted journal article supplement (https://thorax.bmj.com/content/thoraxjnl-2019-214360)
Supplement: inline-supplementary-material-1 [file inline-supplementary-material-1.pdf]

**Appendix 1: Search strategies of specific database****Ovid MEDLINE (1946 to March 2020)**

|                                                                                                                                               |
|-----------------------------------------------------------------------------------------------------------------------------------------------|
| 1. Pulmonary Disease, Chronic Obstructive/ or Lung diseases, obstructive/ or Obstructive airway disease/ or Chronic obstructive lung disease/ |
| 2. Emphysema/ or Pulmonary Emphysema/ or Bronchitis, Chronic/ or Bronchitis/                                                                  |
| 3. Chronic Obstructive Pulmonary* Disease*.mp.                                                                                                |
| 4. Chronic Obstructive lung* disease*.mp.                                                                                                     |
| 5. (COPD or COAD or chronic bronchi* or emphysema* or hyperlucent lung*).mp.                                                                  |
| 6. or/1-5                                                                                                                                     |
| 7. airway* clearance device*.mp.                                                                                                              |
| 8. airway* clearance therapy.mp.                                                                                                              |
| 9. sputum* clearance technique*.mp.                                                                                                           |
| 10.chest clearance*.mp.                                                                                                                       |
| 11.Acapella*.mp.                                                                                                                              |
| 12.Aerobika*.mp.                                                                                                                              |
| 13.lung flute*.mp.                                                                                                                            |
| 14.positive* expiratory pressure*.mp.                                                                                                         |
| 15.positive expiratory pressure therapy*.mp.                                                                                                  |
| 16.Oscillatory Positive Expiratory Pressure*.mp.                                                                                              |
| 17.OPEP*.mp.                                                                                                                                  |
| 18.or/7-17                                                                                                                                    |
| 19.6 and 18                                                                                                                                   |
| 20.limit 19 to (english language and humans)                                                                                                  |

**EMBASE (1947 to March 2020)**

|                                                                                                                                               |
|-----------------------------------------------------------------------------------------------------------------------------------------------|
| 1. Pulmonary Disease, Chronic Obstructive/ or Lung diseases, obstructive/ or Obstructive airway disease/ or Chronic obstructive lung disease/ |
| 2. Emphysema/ or Pulmonary Emphysema/ or Bronchitis, Chronic/ or Bronchitis/                                                                  |
| 3. Chronic Obstructive Pulmonary* Disease*.mp.                                                                                                |
| 4. Chronic Obstructive lung* disease*.mp.                                                                                                     |
| 5. (COPD or COAD or chronic bronchi* or emphysema* or hyperlucent lung*).mp.                                                                  |
| 6. or/1-5                                                                                                                                     |
| 7. airway* clearance device*.mp.                                                                                                              |

|                                                  |
|--------------------------------------------------|
| 8. airway* clearance therapy.mp.                 |
| 9. sputum* clearance technique*.mp.              |
| 10.chest clearance*.mp.                          |
| 11.Acapella*.mp.                                 |
| 12.Aerobika*.mp.                                 |
| 13.lung flute*.mp.                               |
| 14.positive* expiratory pressure*.mp.            |
| 15.positive expiratory pressure therapy*.mp.     |
| 16.Oscillatory Positive Expiratory Pressure*.mp. |
| 17.OPEP*.mp.                                     |
| 18.or/7-17                                       |
| 19.6 and 18                                      |
| 20.limit 19 to (english language and humans)     |

#### **CINAHL (EBSCO) (1960 to March 2020)**

|                                                                                       |
|---------------------------------------------------------------------------------------|
| 1. (MM “Lung Diseases, Obstructive”) OR (MM “Pulmonary Disease, Chronic Obstructive”) |
| 2. (MM “Emphysema”) OR (MM “Bronchitis, Chronic”) OR (MM “Bronchitis”)                |
| 3. S1 OR S2                                                                           |
| 4. (TX “OPEP”) OR (MM” Oscillatory Positive Expiratory Pressure”)                     |
| 5. (MM” positive expiratory pressure therapy”) OR (MM” positive expiratory pressure”) |
| 6. (TX” lung flute”) OR (MM” lung flute”)                                             |
| 7. (TX” Flutter device”) OR (MM” Flutter device”)                                     |
| 8. (MM” Aerobika”) OR (MM” Acapella”)                                                 |
| 9. (TX” chest clearance technique”) OR (TX” sputum clearance technique”)              |
| 10. (TX” airway clearance therapy”) OR (MM” airway clearance device”)                 |
| 11. S4 OR S5 OR S6 OR S7 OR S8 OR S9 OR S10                                           |
| 12. S3 AND S11                                                                        |
| 13. Limit S12 to Language: English                                                    |

#### **Cochrane Database of Systematic Reviews – up to March 2020**

| ID  | Search                                                                         |
|-----|--------------------------------------------------------------------------------|
| #1  | (airway clearance device):ti,ab,kw (Word variations have been searched)        |
| #2  | airway clearance technique                                                     |
| #3  | airway clearance therapy                                                       |
| #4  | chest clearance technique                                                      |
| #5  | sputum clearance technique                                                     |
| #6  | Acapella                                                                       |
| #7  | Aerobika                                                                       |
| #8  | Flutter device                                                                 |
| #9  | lung flute                                                                     |
| #10 | positive expiratory pressure                                                   |
| #11 | positive expiratory pressure therapy                                           |
| #12 | Oscillatory Positive Expiratory Pressure                                       |
| #13 | OPEP                                                                           |
| #14 | #1 or #2 or #3 or #4 or #5 or #6 or #7 or #8 or #9 or #10 or #11 or #12 or #13 |
| #15 | Chronic Obstructive Pulmonary Disease                                          |
| #16 | Chronic Obstructive lung disease                                               |
| #17 | COPD                                                                           |
| #18 | #15 or #16 or #17                                                              |
| #19 | #14 and #18                                                                    |

### PubMed – up to March 2020

1. airway[All Fields] AND clearance[All Fields] AND ("equipment and supplies"[MeSH Terms] OR ("equipment"[All Fields] AND "supplies"[All Fields]) OR "equipment and supplies"[All Fields] OR "device"[All Fields])
2. airway[All Fields] AND clearance[All Fields] AND technique[All Fields]
3. airway[All Fields] AND clearance[All Fields] AND ("therapy"[Subheading] OR "therapy"[All Fields] OR "therapeutics"[MeSH Terms] OR "therapeutics"[All Fields])
4. ("thorax"[MeSH Terms] OR "thorax"[All Fields] OR "chest"[All Fields]) AND clearance[All Fields] AND technique[All Fields]
5. ("sputum"[MeSH Terms] OR "sputum"[All Fields]) AND clearance[All Fields] AND technique[All Fields]
6. Acapella[All Fields]
7. Aerobika[All Fields]
8. Flutter[All Fields] AND ("equipment and supplies"[MeSH Terms] OR ("equipment"[All Fields] AND "supplies"[All Fields]) OR "equipment and supplies"[All Fields] OR "device"[All Fields])
9. ("lung"[MeSH Terms] OR "lung"[All Fields]) AND flute[All Fields]
10. positive[All Fields] AND ("exhalation"[MeSH Terms] OR "exhalation"[All Fields] OR "expiratory"[All Fields]) AND ("pressure"[MeSH Terms] OR "pressure"[All Fields])
11. positive[All Fields] AND ("exhalation"[MeSH Terms] OR "exhalation"[All Fields] OR "expiratory"[All Fields]) AND ("pressure"[MeSH Terms] OR "pressure"[All Fields])

- AND ("therapy"[Subheading] OR "therapy"[All Fields] OR "therapeutics"[MeSH Terms] OR "therapeutics"[All Fields])
12. Oscillatory[All Fields] AND Positive[All Fields] AND ("exhalation"[MeSH Terms] OR "exhalation"[All Fields] OR "expiratory"[All Fields]) AND ("pressure"[MeSH Terms] OR "pressure"[All Fields])
  13. OPEP[All Fields]
  14. "pulmonary disease, chronic obstructive"[MeSH Terms] OR ("pulmonary"[All Fields] AND "disease"[All Fields] AND "chronic"[All Fields] AND "obstructive"[All Fields]) OR "chronic obstructive pulmonary disease"[All Fields] OR ("chronic"[All Fields] AND "obstructive"[All Fields] AND "pulmonary"[All Fields] AND "disease"[All Fields])
  15. "pulmonary disease, chronic obstructive"[MeSH Terms] OR ("pulmonary"[All Fields] AND "disease"[All Fields] AND "chronic"[All Fields] AND "obstructive"[All Fields]) OR "chronic obstructive pulmonary disease"[All Fields] OR ("chronic"[All Fields] AND "obstructive"[All Fields] AND "lung"[All Fields] AND "disease"[All Fields]) OR "chronic obstructive lung disease"[All Fields]
  16. "pulmonary disease, chronic obstructive"[MeSH Terms] OR ("pulmonary"[All Fields] AND "disease"[All Fields] AND "chronic"[All Fields] AND "obstructive"[All Fields]) OR "chronic obstructive pulmonary disease"[All Fields] OR "copd"[All Fields]
