# Supplementary material
Source: HighWire-hosted journal article supplement (https://thorax.bmj.com/content/thoraxjnl-2019-214360)
Supplement: inline-supplementary-material-2 [file inline-supplementary-material-2.pdf]

**Appendix 2: Excluded articles**

| <b>Study (n=69)</b>     | <b>Reason for exclusion</b> |
|-------------------------|-----------------------------|
| Ambrosino, 1995         | Mixed population            |
| Berton, 2015            | Study protocol              |
| Bondalapati, 2014       | Conference abstract         |
| Butcher, 2007           | Mixed population            |
| Cardoso, 2012           | Not-OPEP                    |
| Cegla, 2010             | Critical appraisal          |
| Chakravorty, 2011       | Not-OPEP                    |
| Christensen, 1990       | Not-OPEP                    |
| Coppolo, 2016           | Retrospective               |
| Cross, 2012             | Not-OPEP                    |
| D'Abrosca, 2017         | Retrospective               |
| D'Cruz, 2018            | Retrospective               |
| Daynes, 2018            | Conference abstract         |
| Eastwood, 2016          | Retrospective               |
| Esquina, 2014           | Conference abstract         |
| Gastaldi, 2014          | Single session treatment    |
| Haluszka, 1990          | Not-OPEP                    |
| Hardy, 1996             | Critical appraisal          |
| Kamimura, 2015          | Mixed population            |
| Kamimura, 2017          | Mixed population            |
| Kanhere, 2013           | Not-OPEP                    |
| Khoudigian-Sinani, 2017 | Retrospective               |
| Lee, 2008               | Retrospective               |
| Li, 2016                | Study protocol              |
| Lindemann, 1992         | Mixed population            |
| Mahajan, 2011           | Mixed population            |
| Mahajan, 2011           | Mixed population            |
| Mascardi, 2016          | Not-OPEP                    |
| Morsch, 2008            | Mixed population            |
| Morsch, 2008            | Mixed population            |
| Mussche, 2018           | Conference abstract         |
| Nct, 2014               | Mixed population            |
| Nicolini, 1970          | Not-OPEP                    |
| Nicolini, 2015          | Posters                     |
| Nicolini, 2016          | Posters                     |
| Olseni, 1994            | Not-OPEP                    |
| Osadnik, 2012           | Retrospective               |
| Osadnik, 2013           | Conference abstract         |
| Osadnik, 2013           | Conference abstract         |

|                      |                          |
|----------------------|--------------------------|
| Osadnik, 2013        | Single session treatment |
| Packao, 2010         | Single session treatment |
| Panaligan, 2012      | Conference abstract      |
| Phimphasak, 2016     | Study protocol           |
| Piroddi, 2016        | Posters                  |
| Pongpanit, 2015      | Study protocol           |
| Raafat, 2017         | Study protocol           |
| Ragavan, 2012        | Laboratory-based studies |
| Robins, 2015         | Not-OPEP                 |
| Sethi, 2007          | Study protocol           |
| Sheng, 2013          | Conference abstract      |
| Spanevello, 2015     | Study protocol           |
| Suggett, 2015        | Conference abstract      |
| Suggett, 2016        | Retrospective            |
| Suggett, 2017        | Laboratory-based studies |
| Suggett, 2017        | Retrospective            |
| Svenningsen, 2013    | Conference abstract      |
| Svenningsen, 2013    | Conference abstract      |
| Svenningsen, 2014    | Mixed population         |
| Svenningsen, 2016    | Conference abstract      |
| Thanh, 2019          | Retrospective            |
| Titova, 2005         | Mixed population         |
| Usmani, 2013         | Study protocol           |
| van der Schans, 1995 | Not-OPEP                 |
| Varghese, 2014       | Study protocol           |
| Voshaar, 1996        | Mixed population         |
| Weingarten, 2015     | Study protocol           |
| Westerdahl, 2017     | Retrospective            |
| Weycker, 2017        | Retrospective            |
| Wolkove, 2002        | Single session treatment |
